# Supplementary material for: Bis-anthracycline WP760 abrogates melanoma cell growth by transcription inhibition, p53 activation and IGF1R downregulation
Source: PubMed Central journal article supplement (PMC5613070; doi:10.1007/s10637-017-0465-9), 2017-04-17
Supplement: 10637_2017_465_MOESM1_ESM.pdf [file 10637_2017_465_MOESM1_ESM.pdf]

## Bis-anthracycline WP760 abrogates melanoma cell growth by transcription inhibition and p53 activation

Magdalena Olbryt<sup>1</sup>, Aleksandra Rusin, Izabela Fokt, Anna Habryka, Patrycja Tudrej, Sebastian Student, Aleksander Sochanik, Rafał Zieliński, Waldemar Priebe

<sup>1</sup>Center for Translational Research and Molecular Biology of Cancer, Maria Skłodowska-Curie Memorial Cancer Center and Institute of Oncology, Gliwice Branch, Gliwice, Poland

*Investigational New Drugs*

### Supplementary material

Table S1. Cell lines

| Name                                                                      | Medium          | Repositorium                                              |
|---------------------------------------------------------------------------|-----------------|-----------------------------------------------------------|
| 1205Lu, 451Lu, WM1552C, WM278, WM35                                       | Tu2%            | ATCC                                                      |
| WM1382, WM3248, WM3928F                                                   | Tu2%            | Coriell Cell                                              |
| A375, Mel1617, SB2, SKMel-28, WM793B VR, SKMel-28 VR, Mel1617 VR, A375 VR | RPMI1640 5% FBS | MD Anderson*                                              |
| A549                                                                      | DMEM 10% FBS    | ATCC                                                      |
|                                                                           | RPMI 10% FBS    | derived by us from ovarian cancer patient's ascites fluid |

\* Cells were kindly provided by Professor Menashe Bar-Eli, Department of Cancer Biology, UT M.D. Anderson Cancer Center, Houston, Texas, USA

Table S2. Sequences of the primers used in qRT-PCR

| Gene          | (National Center for Biotechnology Information reference sequence number) | Left primer            | Right primer             |
|---------------|---------------------------------------------------------------------------|------------------------|--------------------------|
| <i>ABCC1</i>  | XM_011522498.1<br>XM_011522497.1<br>NM_004996.3                           | ccatgtgggaaaacacatctt  | ctgtgcgtgaccaagatcc      |
| <i>HDAC4</i>  | NM_006037<br>NP_006028                                                    | ccatggagaaagtcattggaga | tctgagcctcgatcagagaac    |
| <i>MTOR</i>   | XM_005263438.1<br>NM_004958.3                                             | tgctggaagcctttgtctatg  | cgcttggtgcctttggtatt     |
| <i>PLK2</i>   | NM_006622.3                                                               | agatctcgcggattatcgtc   | tgtaaatctgtcatctcgtaca   |
| <i>RPLPO</i>  | NM_001002.3<br>NM_053275.3                                                | gatgccaggggaagacag     | acaatgaaacatttcggataatca |
| <i>B2M</i>    | NM_004048.2                                                               | ttctggcctggaggctatc    | tcaggaaatttgacttccattc   |
| <i>PLXNB2</i> | NM_012401.2                                                               | ggcgcgtcatctgcaactc    | taaggaggagctggatggtc     |

Table S3. Antibodies used in Western blotting

| Antibody                                | Dilution | Firm                            | Cat. No. |
|-----------------------------------------|----------|---------------------------------|----------|
| anti- cleaved Caspase 3 (Asp175) (5A1E) | 1:2000   | Cell Signaling Technology       | #9664    |
| anti-HSC70 (B-6)                        | 1:3000   | Santa Cruz Biotechnology        | SC-7298  |
| anti-IGF1Rbeta (D23H3)                  | 1:2000   | Cell Signaling Technology       | #9750    |
| anti-P21 (F-5)                          | 1:500    | Santa Cruz Biotechnology        | SC-6246  |
| anti-TP53 (DO-1)                        | 1:2000   | Santa Cruz Biotechnology        | SC-126   |
| Goat anti-Rabbit IgG (H+L), HRP         | 1:2000   | Thermo Fisher Scientific Pierce | #31460   |
| Goat anti-Mouse IgG (H+L), HRP          | 1:2000   | Thermo Fisher Scientific Pierce | #31430   |

Table S4. Apoptotic index of melanoma cells treated with 100 nM WP760 assessed with TUNEL assay.

| Cell line      | Apoptotic index (%) |         |
|----------------|---------------------|---------|
|                | Control             | Treated |
|                | <b>24h</b>          |         |
| <b>WM1552C</b> | 0.4                 | 2.5     |
| <b>WM278</b>   | 0.9                 | 2.0     |
| <b>WM3248</b>  | 1.0                 | 6.4     |
| <b>WM35</b>    | 1.8                 | 7.5     |
| <b>WM793B</b>  | 1.2                 | 6.4     |
|                | <b>48h</b>          |         |
| <b>1205Lu</b>  | 0.8                 | 9.9*    |
| <b>451Lu</b>   | 0.6                 | 4.0     |
| <b>WM1382</b>  | 0.4                 | 4.5     |
| <b>WM3928F</b> | 0                   | 0       |

\*WP760 – 50 nM

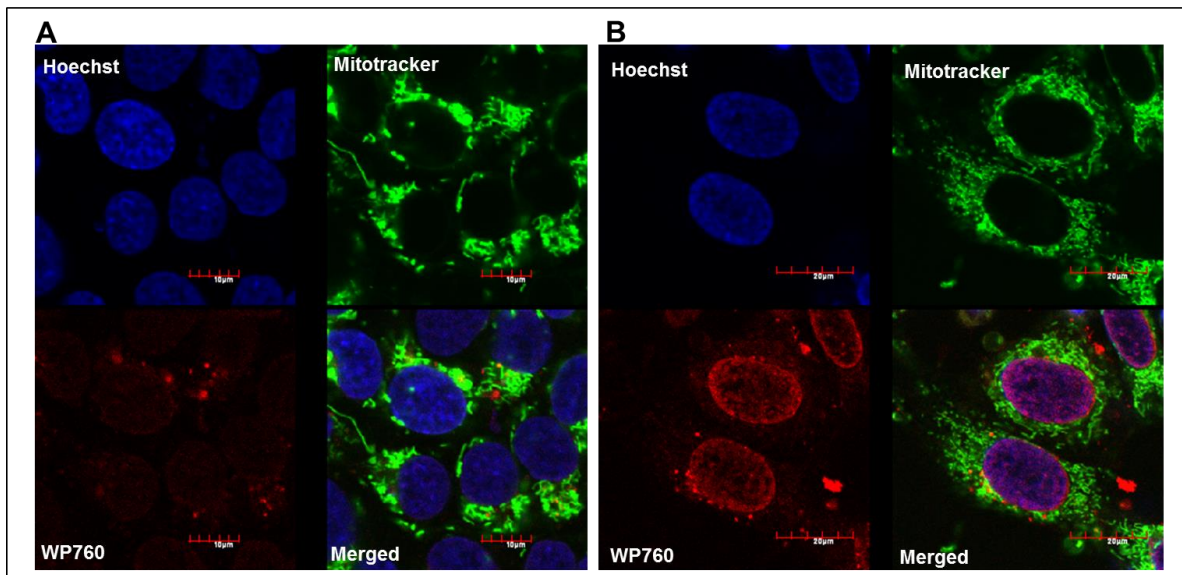

**Fig. S1. Accumulation of WP760 in the nucleus of A-375 cells.** A-375 cells plated on chambered coverglass were exposed to WP760 (1  $\mu$ M) for 2 (A) and 24 h (B) followed by imaging using Olympus FLV1000 confocal system. Hoechst 33342 (blue) at 1  $\mu$ g/ml and 75 nM Mitotracker (green) was used for nuclei and mitochondria counter staining
